# Supplementary material for: Deep Learning-Based Algorithm for Automatic Detection of Pulmonary Embolism in Chest CT Angiograms
Source: MDPI journal article supplement (doi:10.3390/diagnostics13071324), 2023-04-03
Supplement: s1 [file s1]

## Supplementary Material

**Table S1: Algorithm performances across all subgroups of imaging acquisitions and scan parameters, and patients' groups (US regions, patients' age and sex).**

| PARAMETER | CATEGORY | TP  | FN | TN  | FP | Sensitivity<br>[95% CI]  | Specificity<br>[95% CI]  |
|-----------|----------|-----|----|-----|----|--------------------------|--------------------------|
| TYPE      | All      | 170 | 16 | 184 | 17 | 91.4%<br>[86.4% – 95.0%] | 91.5%<br>[86.8% – 95.0%] |

|        |        |    |     |   |    |                           |                           |
|--------|--------|----|-----|---|----|---------------------------|---------------------------|
| GENDER | Male   | 85 | 106 | 8 | 6  | 93.41%<br>[86.2% - 97.5%] | 92.98%<br>[86.6% - 96.9%] |
|        | Female | 85 | 78  | 9 | 10 | 89.47%<br>[81.5% - 94.8%] | 89.66%<br>[81.3% - 95.2%] |

|     |               |    |    |     |    |                           |                           |
|-----|---------------|----|----|-----|----|---------------------------|---------------------------|
| AGE | 18 ≤ Age < 40 | 23 | 0  | 14  | 3  | 100%<br>[85.2% - 100%]    | 82.35%<br>[56.6% - 96.2%] |
|     | 40 ≤ Age ≤ 60 | 61 | 3  | 45  | 4  | 95.31%<br>[86.9% - 99.0%] | 91.84%<br>[80.4% - 97.7%] |
|     | Age > 60      | 86 | 13 | 125 | 10 | 86.87%<br>[78.6% - 92.8%] | 92.59%<br>[86.8% - 96.4%] |

|                 |                      |    |    |     |   |                           |                           |
|-----------------|----------------------|----|----|-----|---|---------------------------|---------------------------|
| SLICE THICKNESS | ST < 1.5 mm          | 75 | 6  | 71  | 8 | 92.59%<br>[84.6% - 97.2%] | 89.87%<br>[81.0% - 95.5%] |
|                 | 1.5 mm ≤ ST ≤ 2.5 mm | 95 | 10 | 113 | 9 | 90.48%<br>[83.2% - 95.3%] | 92.62%<br>[86.5% - 96.6%] |

|               |                 |    |    |     |    |                           |                           |
|---------------|-----------------|----|----|-----|----|---------------------------|---------------------------|
| DETECTOR ROWS | 4 < NDR ≤ 8     | 0  | 0  | 0   | 0  | NA                        | NA                        |
|               | 8 < NDR ≤ 16    | 24 | 0  | 14  | 1  | 100%<br>[85.8% - 100%]    | 93.33%<br>[68.1% - 99.8%] |
|               | 16 < NDR ≤ 32   | 22 | 3  | 31  | 2  | 88%<br>[68.8% - 97.5%]    | 93.94%<br>[79.8% - 99.3%] |
|               | 32 < NDR ≤ 64   | 94 | 10 | 105 | 12 | 90.38%<br>[83.0% - 95.3%] | 89.74%<br>[82.8% - 94.6%] |
|               | 64 < NDR ≤ 128  | 19 | 2  | 21  | 1  | 90.48%<br>[69.6% - 98.8%] | 95.45%<br>[77.2% - 99.9%] |
|               | 128 < NDR ≤ 256 | 0  | 0  | 0   | 0  | NA                        | NA                        |
|               | 256 < NDR ≤ 320 | 1  | 0  | 0   | 0  | 100%<br>[2.5% - 100%]     | NA                        |

|            |             |    |   |    |   |                           |                           |
|------------|-------------|----|---|----|---|---------------------------|---------------------------|
| US REGIONS | Continental | 23 | 3 | 25 | 2 | 88.46%<br>[69.9% - 97.6%] | 92.59%<br>[75.7% - 99.1%] |
|            | Northeast   | 83 | 6 | 93 | 5 | 93.26%<br>[85.9% - 97.5%] | 94.9%<br>[88.5% - 98.3%]  |
|            | Pacific     | 16 | 1 | 26 | 3 | 94.12%<br>[71.3% - 99.9%] | 89.66%<br>[72.7% - 97.8%] |
|            | Southeast   | 48 | 6 | 40 | 7 | 88.89%<br>[77.4% - 95.8%] | 85.11%<br>[71.7% - 93.8%] |



|              |                    |     |    |     |    |                           |                           |
|--------------|--------------------|-----|----|-----|----|---------------------------|---------------------------|
| MANUFACTURER | GE MEDICAL SYSTEMS | 105 | 12 | 100 | 10 | 89.74%<br>[82.8% - 94.6%] | 90.91%<br>[83.9% - 95.6%] |
|              | PHILIPS            | 15  | 0  | 15  | 2  | 100%<br>[78.2% - 100%]    | 88.24%<br>[63.6% - 98.5%] |
|              | SIEMENS            | 36  | 2  | 51  | 4  | 94.74%<br>[82.3% - 99.4%] | 92.73%<br>[82.4% - 98.0%] |
|              | TOSHIBA/<br>CANON  | 13  | 2  | 18  | 1  | 86.67%<br>[59.5% - 98.3%] | 94.74%<br>[74.0% - 99.9%] |
|              | PNMS               | 1   | 0  | 0   | 0  | 100%<br>[2.5% - 100%]     | NA                        |

**Table S2: CINA–PE standalone validation study: Details regarding the found false negative (FN) cases.**

| CASE N° | False negatives' descriptions                                                                                                                                                                                                                                               |
|---------|-----------------------------------------------------------------------------------------------------------------------------------------------------------------------------------------------------------------------------------------------------------------------------|
| FN #1   | Missed right very small segmental <b>Chronic PE</b><br><b>This case was subject of consensus</b><br><b>Presence of vena cava artifacts</b><br>Presence bronchiolitis                                                                                                        |
| FN #2   | Missed right lobar and segmental <b>Chronic PE</b><br>Presence of <b>linear filling defect</b> within the PE (more peripheral filling defect)<br>Presence of ground glass opacity<br>Presence of pleural fluid                                                              |
| FN #3   | Missed right very small segmental PE<br>Presence of tots of lung nodules                                                                                                                                                                                                    |
| FN #4   | Missed left small segmental PE located close to a <b>partial volume effect artifact</b><br>The location of this PE is <b>limit subsegmental</b><br>Presence of bilateral pleural effusions                                                                                  |
| FN #5   | Missed right very small segmental <b>Chronic PE</b><br>Presence of <b>acquisition artifacts</b><br>Presence of atelectasis                                                                                                                                                  |
| FN #6   | Missed very small left lobar and segmental <b>Chronic PE</b> close to <b>partial volume effect artifacts</b><br><b>This case was subject of consensus</b><br>Presence of multiple noncalcified pulmonary nodules<br>Presence of calcified mediastinal/subcarinal lymph node |
| FN #7   | Missed right interlobar <b>Chronic PE</b><br>Presence of <b>linear filling defect</b> within the PE<br><b>This case was subject of consensus</b>                                                                                                                            |
| FN #8   | Missed left segmental PE<br>Presence of <b>bad contrast filling</b>                                                                                                                                                                                                         |



|        |                                                                                                                                                                                                                            |
|--------|----------------------------------------------------------------------------------------------------------------------------------------------------------------------------------------------------------------------------|
| FN #9  | <p>Missed right main <b>Chronic PE</b></p> <p>PE located inside of <b>important motion artifacts</b> and <b>cava vena artifacts</b></p>                                                                                    |
| FN #10 | <p>Missed right segmental PE in presence of <b>volume partial effect artifacts</b></p> <p>Presence of <b>bad contrast filling</b></p>                                                                                      |
| FN #11 | <p>Missed left small segmental PE</p> <p><b>Nosy images</b></p> <p><b>Presence of bad contrast filling</b></p> <p>Presence of pulmonary edema, pneumonia, and pleural effusion</p>                                         |
| FN #12 | <p>Missed right segmental PE</p> <p>The location of this PE is <b>limit subsegmental</b></p> <p><b>Complete occlusion of the artery</b></p>                                                                                |
| FN #13 | <p>Missed bilateral small segmental PE</p> <p>The location of this PE is <b>limit subsegmental</b></p>                                                                                                                     |
| FN #14 | <p>Missed right segmental PE close to <b>hilar lymph node</b> and <b>partial volume effect artefacts</b></p> <p>Presence of bunch of nodules, pleural effusion, and ground glass opacity</p> <p>Presence of metastasis</p> |
| FN #15 | <p>Missed left main PE in presence of <b>tumor near to the occlusion</b></p> <p>Presence of metastatic nodules</p> <p>Presence of Pneumonia and complex pleural effusion</p>                                               |
| FN #16 | <p>Missed right main PE <b>at the limits of chronic PE transformation</b></p> <p>Presence of an important pneumothorax in the right lung.</p>                                                                              |



**Table S3: CINA–PE standalone validation study: Details regarding the found false positive (FP) cases.**

| CASE N° | False positives' descriptions                                                                                                                                                                                                                                                                                                           |
|---------|-----------------------------------------------------------------------------------------------------------------------------------------------------------------------------------------------------------------------------------------------------------------------------------------------------------------------------------------|
| FP #1   | PE wrongly detected within a <b>pulmonary vein</b><br><b>Important vena cava artifacts</b><br><b>Contrast mixing</b>                                                                                                                                                                                                                    |
| FP #2   | Large <b>subsegmental</b> PE <b>correctly</b> detected<br><b>This case was subject of consensus</b><br>Presence of atelectasis, consolidation, and pleural effusion                                                                                                                                                                     |
| FP #3   | <b>Very bad quality images:</b> PE wrongly detected in <b>the pleural effusion</b> in presence of <b>very noisy images</b> and <b>important streak artifacts</b><br>Presence of atelectasis, pneumothorax, and pleural effusion                                                                                                         |
| FP #4   | PE wrongly detected <b>in the vena cava artifacts.</b><br><b>This case was subject of consensus</b><br>Presence of nodule, atelectasis, and pneumonia<br>Presence of pneumothorax and pleural effusion<br>Presence of drainage catheter                                                                                                 |
| FP #5   | PE wrongly detected in the <b>hilar lymph node</b><br>Presence of emphysema, consolidation, and atelectasis<br>Presence of pneumothorax and pleural effusion                                                                                                                                                                            |
| FP #6   | PE wrongly detected in the <b>vena cava artifacts.</b><br><b>Poor contrast filling and anatomic distortion</b><br>Presence of ground glass opacity and lung infiltration<br>Presence of pneumothorax, and atelectasis<br>Presence of emphysema                                                                                          |
| FP #7   | Small PE <b>correctly</b> detected within a <b>subsegmental</b> artery<br>Presence of atelectasis                                                                                                                                                                                                                                       |
| FP #8   | PE wrongly detected in the <b>cava vein artefacts.</b><br>Presence of emphysema<br>Presence of nodule                                                                                                                                                                                                                                   |
| FP #9   | PE wrongly detected within a <b>saccular aneurysm</b> stuck to the main pulmonary artery.<br>Presence of <b>central venous catheter</b> with the tip in the brachiocephalic vein<br>Presence of atelectasis/consolidation, and pleural effusion                                                                                         |
| FP #10  | PE <b>correctly</b> detected within a <b>subsegmental</b> artery<br><b>This case was subject of consensus</b><br><b>Contrast mixing</b><br>Presence of <b>streak artifacts and important motion artifacts</b><br>There is an aortic repair (graft)<br>An endotracheal tube is in place<br>Presence of atelectasis and lung infiltration |



|         |                                                                                                                                                                                                                                         |
|---------|-----------------------------------------------------------------------------------------------------------------------------------------------------------------------------------------------------------------------------------------|
| FP #11  | <p>PE <b>correctly</b> detected within <b>subsegmental</b> artery with <b>partial volume effect artifacts</b></p> <p>Presence of <b>bad contrast filling</b></p> <p><b>Noisy images</b></p> <p>Presence of atelectasis, and nodules</p> |
| FP #12  | <p><b>Partial volume effect artifacts</b> (crossing between a vein and an artery)</p> <p>Presence of <b>bad contrast filling, and motion artifacts</b></p> <p>Presence of calcified pleural plaques</p>                                 |
| FP #13  | <p>Streak artifact (graft)</p> <p>Presence of <b>streak artifacts, bad contrast filling, and motion artifacts</b></p> <p><b>This case was subject of consensus</b></p>                                                                  |
| FP #14  | <p>PE correctly detected in a <b>subsegmental</b> artery</p> <p><b>This case was subject of consensus</b></p> <p>Presence of pulmonary nodules</p>                                                                                      |
| FP #15  | <p>PE correctly detected in a <b>subsegmental</b> artery, although very close to the segmental artery</p> <p><b>This case was subject of consensus</b></p>                                                                              |
| FP # 16 | <p>PE within a <b>pulmonary vein</b></p> <p>Presence of ground glass opacity</p>                                                                                                                                                        |
| FP #17  | <p>PE within <b>vena cava artifacts</b></p>                                                                                                                                                                                             |
